# Supplementary material for: Functional Interaction between Adenosine A2A and mGlu5 Receptors Mediates STEP Phosphatase Activation and Promotes STEP/mGlu5R Binding in Mouse Hippocampus and Neuroblastoma Cell Line
Source: MDPI journal article supplement (doi:10.3390/biom13091350), 2023-09-05
Supplement: s1 [file s1]

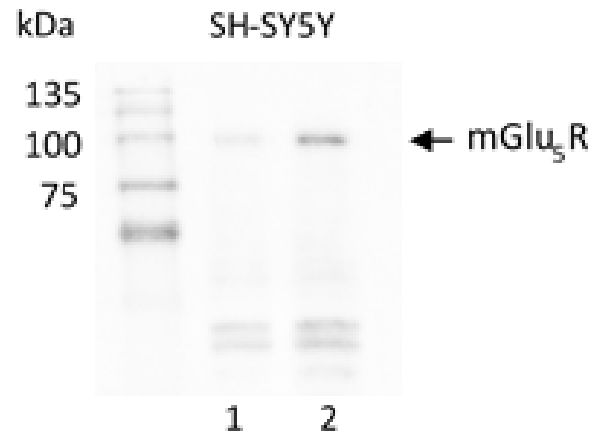

Figure S1.  
mGlu5R protein expression in SH-SY5Y neuroblastoma cells. SH-SY5Y cells were lysed in RIPA buffer and proteins were transferred to nitrocellulose for western blot analysis. Lane 1 and lane 2 were loaded with 20 and 40  $\mu$ g of total proteins, respectively. The blot was probed with monoclonal anti-mGlu5R antibody. The immunoreactive bands were detected by chemiluminescence coupled to peroxidase activity (ECL). The molecular mass markers in kDa are indicated on the left.
